# Supplementary material for: The diversity of recent trends for chondrichthyans in the Mediterranean reflects fishing exploitation and a potential evolutionary pressure towards early maturation
Source: PubMed Central journal article supplement (PMC6969072; doi:10.1038/s41598-019-56818-9), 2020-01-17
Supplement: 41598_2019_56818_MOESM1_ESM.pdf [file 41598_2019_56818_MOESM1_ESM.pdf]

## Supporting information

### **The diversity of recent trends for chondrichthyans in the Mediterranean reflects fishing exploitation and a potential evolutionary pressure towards early maturation**

Running title: trends in Mediterranean chondrichthyans

Sergio Ramírez-Amaro<sup>1,2\*</sup>, Francesc Ordines<sup>1</sup>, Antonio Esteban<sup>3</sup>, Cristina García<sup>4</sup>,  
Beatriz Guijarro<sup>1</sup>, Francisca Salmerón<sup>4</sup>, Bàrbara Terrasa<sup>2</sup>, Enric Massutí<sup>1</sup>.

<sup>1</sup>*Instituto Español de Oceanografía, Centre Oceanogràfic de les Balears, Moll de Ponent s/n, 07015 Palma, Spain.*

<sup>2</sup>*Laboratori de Genètica, Universitat de les Illes Balears, 07122 Palma de Mallorca, Spain.*

<sup>3</sup>*Instituto Español de Oceanografía, Centro Oceanográfico de Murcia, Varadero 1, 30740 San Pedro del Pinar, Murcia, Spain.*

<sup>4</sup>*Instituto Español de Oceanografía, Centro Oceanográfico de Málaga, Muelle Pesquero s/n, 29640 Fuengirola, Málaga, Spain.*

## Supplementary Figures

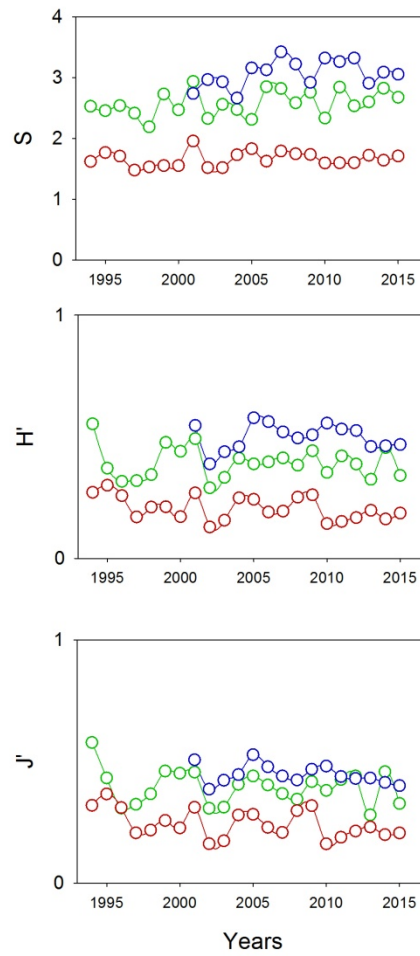

**Figure S1.** Time series of mean species richness ( $S$ ), Shannon diversity ( $H'$ ) and evenness ( $J'$ ) per year and by geographical sub-area (GSA) considered by the General Fisheries Commission for the Mediterranean in the study area (GSA01: Northern Alboran Sea, as green lines; GSA05: Balearic Islands, as blue lines; GSA06: Northern Spain, as red lines) during the periods 1994-2015 in GSA01 and GSA06, and 2001-2015 in GSA05.

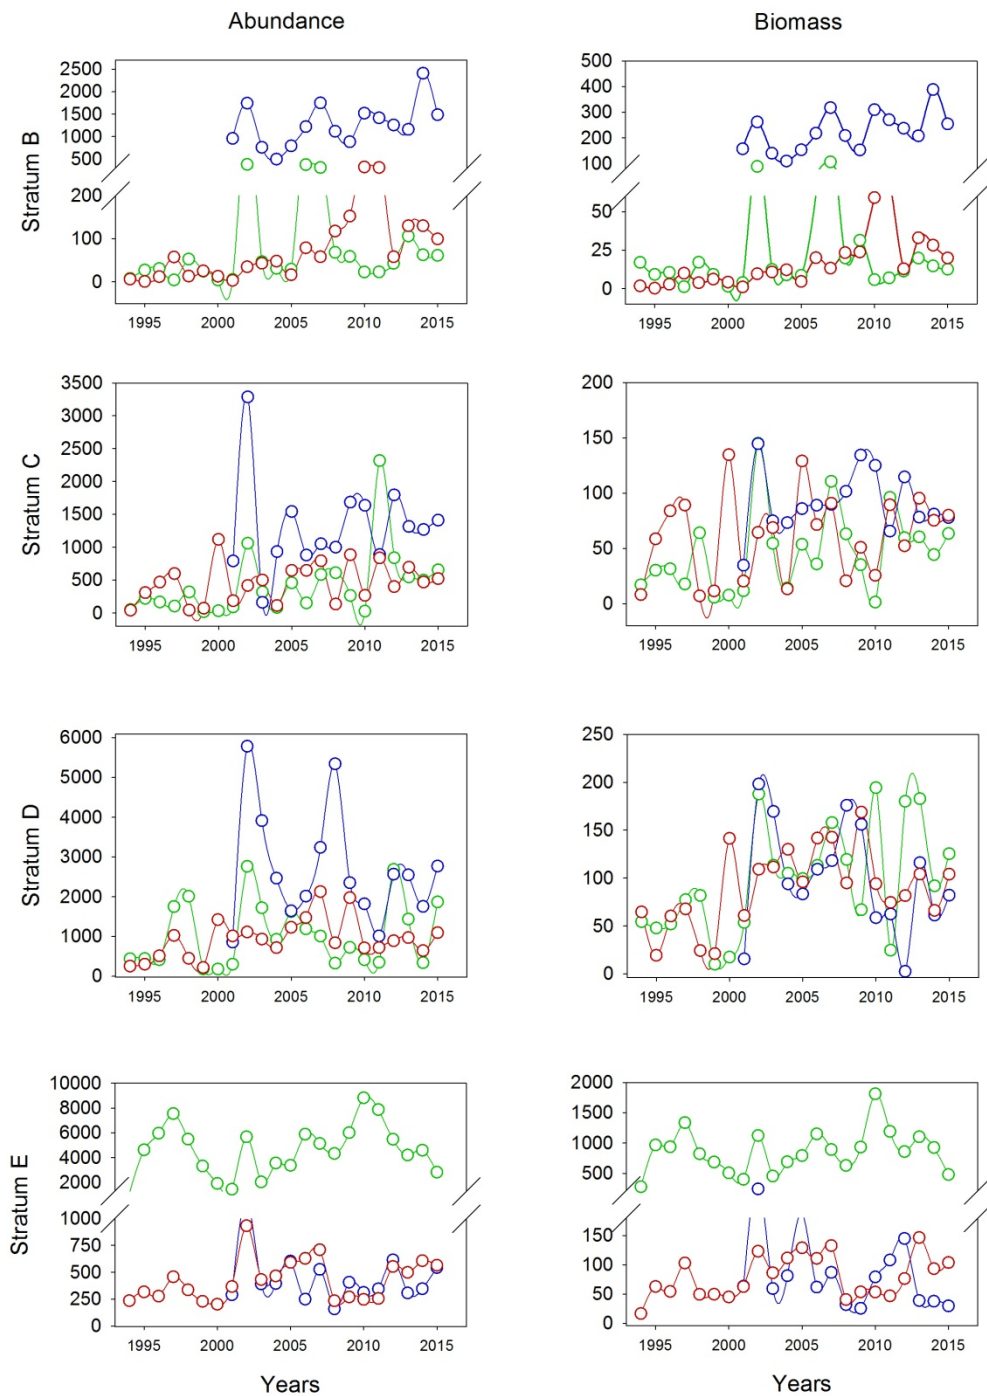

**Figure S2.** Time series of mean density and standardized biomass of sharks per geographical sub-area (GSA) considered by the General Fisheries Commission for the Mediterranean in the study area (GSA01: Northern Alboran Sea, as green lines; GSA05: Balearic Islands, as blue lines; GSA06: Northern Spain, as red lines) and depth stratum (B: 50-100 m; C: 101-200 m; D: 201-500 m; E: 501-800 m) during the periods 1994-2015 in GSA01 and GSA06, and 2001-2015 in GSA05.

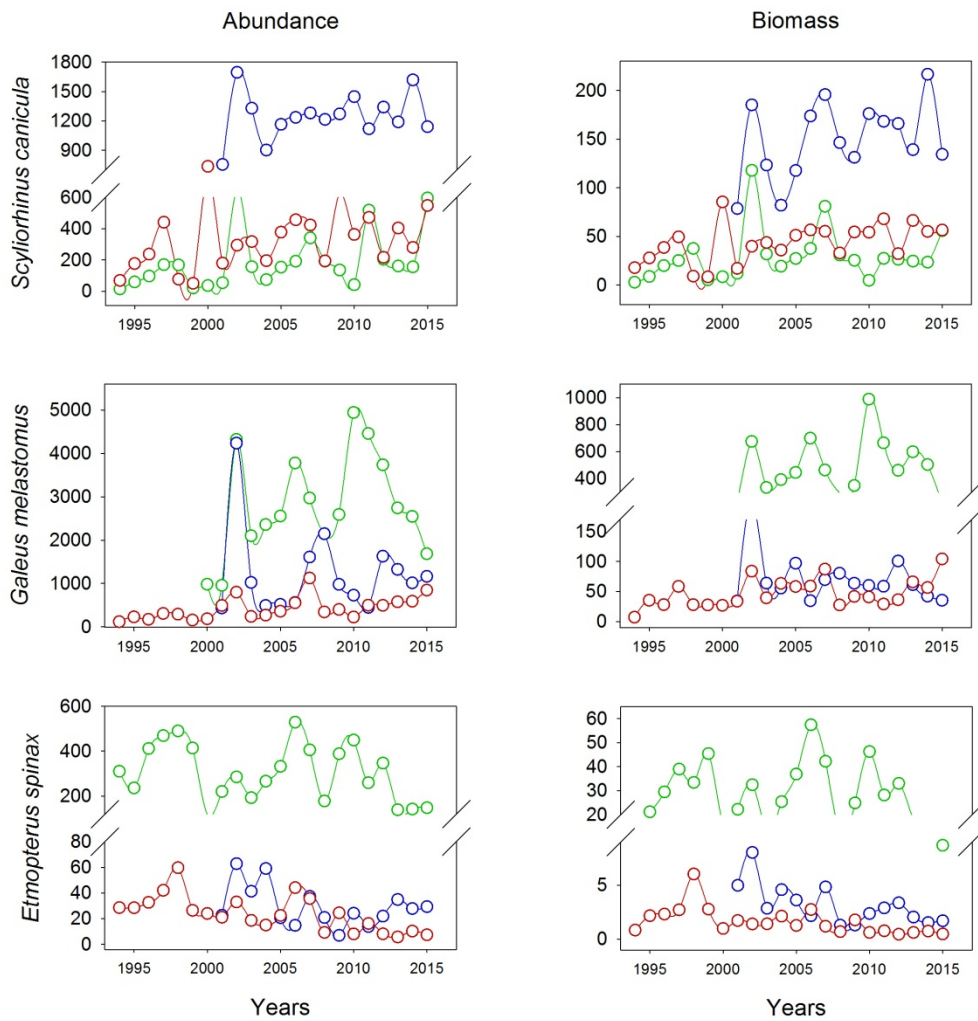

**Figure S3.** Time series of mean density and standardized biomass for the most abundant sharks, *Scyliorhinus canicula*, *Galeus melastomus* and *Etmopterus spinax*, per geographical sub-area (GSA) considered by the General Fisheries Commission for the Mediterranean in the study area (GSA01: Northern Alboran Sea, as green lines; GSA05: Balearic Islands, as blue lines; GSA06: Northern Spain, as red lines) during the periods 1994-2015 in GSA01 and GSA06, and 2001-2015 in GSA05.

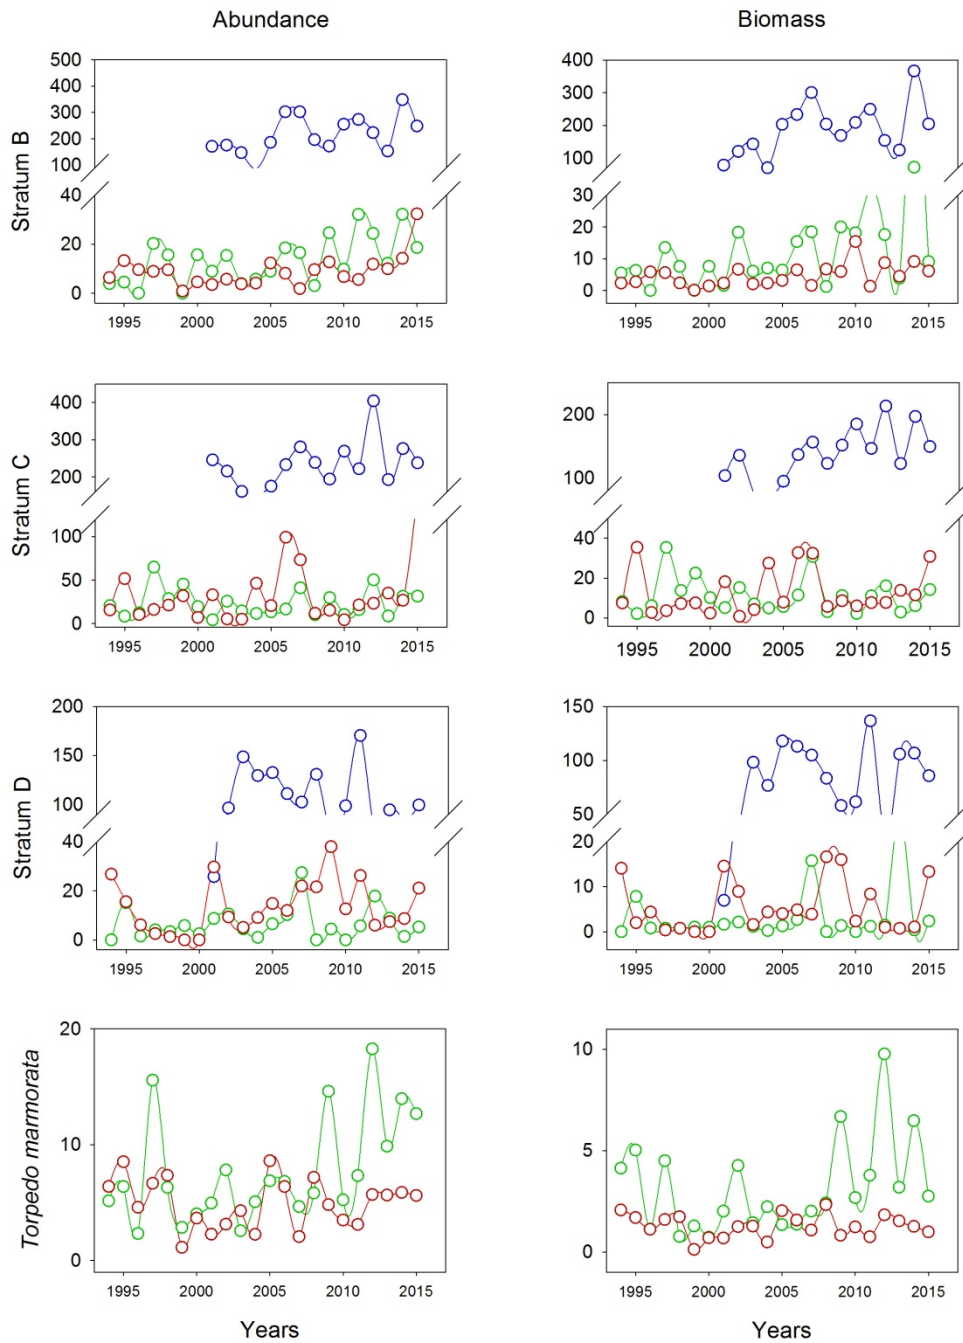

**Figure S4.** Time series of mean density and standardized biomass for batoids and *Torpedo marmorata*. For batoids, the three geographical sub-areas (GSAs) considered by the General Fisheries Commission for the Mediterranean in the study area (GSA01: Northern Alboran Sea, as green lines; GSA05: Balearic Islands, as blue lines; GSA06: Northern Spain, as red lines) and depth stratum (B: 50-100 m; C: 101-200 m; D: 201-500 m; E: 501-800 m) were utilized during the periods 1994-2015 in GSA01 and GSA06 and 2001-2015 in GSA05. For *Torpedo marmorata*, the GSA01 and GSA02 were considered.

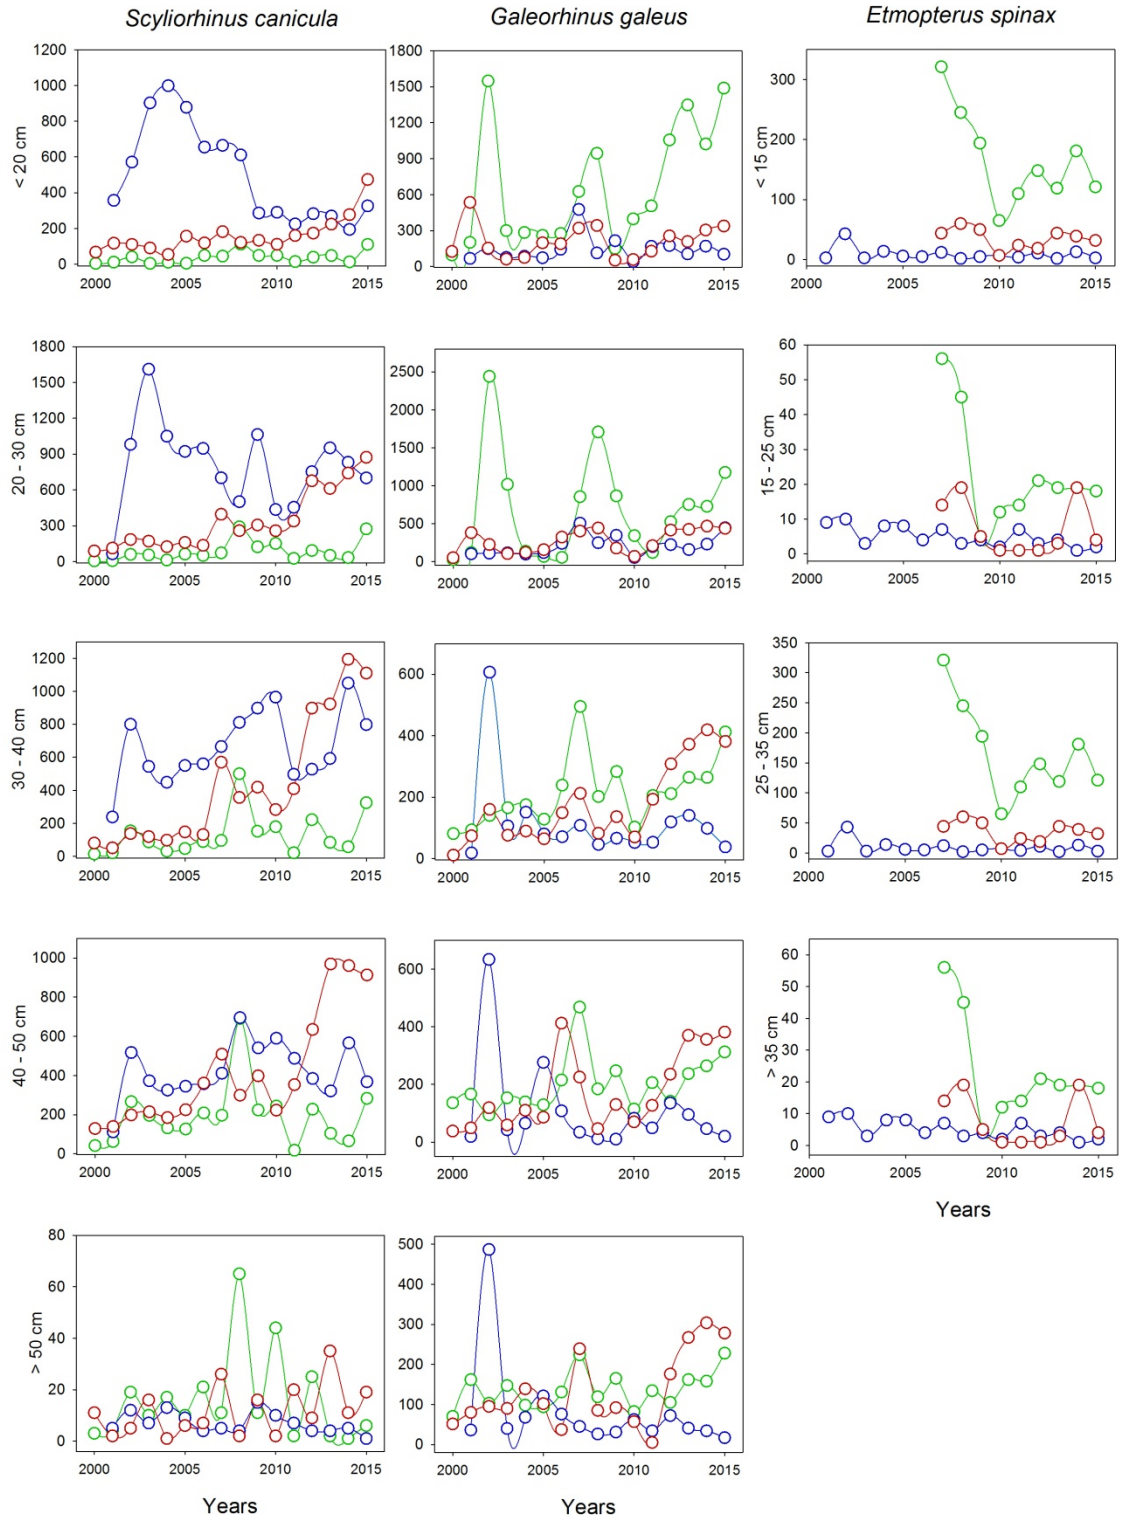

**Figure S5.** Time series of mean density by length category of *Scyliorhinus canicula*, *Galeus melastomus* and *Etmopterus spinax* per geographical sub-area (GSA) considered by the General Fisheries Commission for the Mediterranean in the study area (GSA01: Northern Alboran Sea, as green lines; GSA05: Balearic Islands, as blue lines; GSA06: Northern Spain, as red lines). The length categories of *S. canicula* and *G. melastomus* were the same.

## Supplementary Tables

**Table S1.** Number of bottom trawl samples analysed by year, depth stratum (D) established in the MEDITS surveys (B: 50-100 m; C: 101-200 m; D: 201-500 m; E: 501-800 m) and geographical sub-area (GSA) considered by the General Fisheries Commission for the Mediterranean throughout the study area (GSA01: Northern Alboran Sea; GSA05: Balearic Islands; GSA06: Northern Spain) during the periods 1994-2015 for GSA01 and GSA06 and 2001-2015 for GSA05.

| GSA   | D | 1994 | 1995 | 1996 | 1997 | 1998 | 1999 | 2000 | 2001 | 2002 | 2003 | 2004 | 2005 | 2006 | 2007 | 2008 | 2009 | 2010 | 2011 | 2012 | 2013 | 2014 | 2015 |
|-------|---|------|------|------|------|------|------|------|------|------|------|------|------|------|------|------|------|------|------|------|------|------|------|
| GSA01 | B | 5    | 5    | 5    | 6    | 6    | 9    | 6    | 6    | 8    | 12   | 8    | 8    | 7    | 8    | 7    | 7    | 6    | 6    | 8    | 11   | 13   | 14   |
|       | C | 3    | 3    | 3    | 5    | 5    | 5    | 5    | 5    | 8    | 6    | 5    | 6    | 5    | 7    | 6    | 6    | 4    | 4    | 4    | 5    | 7    | 9    |
|       | D | 6    | 9    | 11   | 10   | 7    | 11   | 12   | 10   | 11   | 11   | 13   | 11   | 11   | 13   | 11   | 11   | 6    | 8    | 9    | 10   | 14   | 19   |
|       | E | 6    | 9    | 12   | 10   | 12   | 12   | 9    | 13   | 13   | 14   | 13   | 11   | 15   | 13   | 7    | 5    | 6    | 7    | 10   | 10   | 14   | 15   |
| GSA05 | B |      |      |      |      |      |      |      | 12   | 23   | 20   | 27   | 23   | 29   | 20   | 20   | 20   | 20   | 21   | 20   | 22   | 22   | 22   |
|       | C |      |      |      |      |      |      |      | 12   | 15   | 15   | 18   | 17   | 16   | 14   | 14   | 14   | 14   | 14   | 14   | 14   | 14   | 14   |
|       | D |      |      |      |      |      |      |      | 8    | 10   | 11   | 12   | 9    | 10   | 8    | 8    | 8    | 8    | 9    | 8    | 9    | 11   | 8    |
|       | E |      |      |      |      |      |      |      | 9    | 11   | 10   | 12   | 10   | 9    | 8    | 8    | 8    | 8    | 9    | 8    | 8    | 8    | 12   |
| GSA06 | B | 19   | 25   | 26   | 25   | 27   | 26   | 29   | 29   | 34   | 36   | 30   | 31   | 33   | 26   | 28   | 28   | 19   | 28   | 34   | 38   | 37   | 30   |
|       | C | 10   | 17   | 15   | 15   | 12   | 17   | 17   | 19   | 19   | 20   | 17   | 17   | 18   | 15   | 21   | 20   | 12   | 21   | 22   | 24   | 26   | 28   |
|       | D | 9    | 15   | 13   | 11   | 8    | 13   | 11   | 20   | 18   | 18   | 17   | 16   | 22   | 13   | 14   | 14   | 10   | 18   | 16   | 19   | 16   | 20   |
|       | E | 8    | 13   | 11   | 8    | 6    | 12   | 7    | 10   | 9    | 10   | 13   | 10   | 11   | 10   | 11   | 12   | 7    | 8    | 8    | 6    | 9    | 12   |

**Table S2.** Results from dynamic factor analysis (DFA) model fitting applied to species richness (S), Shannon diversity (H') and evenness (J') per haul of chondrichthyans per year during the periods 1994-2015 in GSA01 (Northern Alboran Sea) and GSA06 (Northern Spain) and 2001-2015 in GSA05 (Balearic Islands). For each model, the covariance matrix structure, the number of common trends (m) and the corrected Akaike Information Criterion (AICc) are given. Models in italics represent those selected as the models that produced the most favorable covariance matrix structure (with the lowest AICc values).

| Length category      | Covariance matrix structure | m                         | Log-likelihood | AICc   |
|----------------------|-----------------------------|---------------------------|----------------|--------|
| Richness (S)         | <i>Diagonal and equal</i>   | 1                         | -82.20         | 173.14 |
|                      | Equalvarcov                 | 1                         | -82.16         | 175.44 |
|                      | Diagonal and unequal        | 1                         | -82.08         | 177.79 |
|                      | Diagonal and equal          | 2                         | -82.19         | 178.01 |
|                      | Equalvarcov                 | 2                         | -82.15         | 180.50 |
|                      | Diagonal and equal          | 3                         | -82.20         | 180.59 |
|                      | Unconstrained               | 1                         | -80.00         | 181.67 |
|                      | Diagonal and unequal        | 2                         | -82.08         | 183.05 |
|                      | Equalvarcov                 | 3                         | -82.16         | 183.19 |
|                      | Diagonal and unequal        | 3                         | -82.08         | 185.84 |
|                      | Unconstrained               | 2                         | -80.00         | 187.62 |
|                      | Unconstrained               | 3                         | -80.01         | 190.78 |
|                      | Diversity (H')              | <i>Equalvarcov</i>        | 1              | -78.74 |
| Equalvarcov          |                             | 2                         | -78.72         | 173.69 |
| Diagonal and equal   |                             | 1                         | -82.66         | 174.07 |
| Equalvarcov          |                             | 3                         | -78.74         | 176.37 |
| Unconstrained        |                             | 1                         | -78.24         | 178.16 |
| Diagonal and unequal |                             | 1                         | -82.29         | 178.21 |
| Diagonal and equal   |                             | 2                         | -82.66         | 178.94 |
| Diagonal and equal   |                             | 3                         | -82.67         | 181.52 |
| Diagonal and unequal |                             | 2                         | -82.29         | 183.47 |
| Unconstrained        |                             | 2                         | -78.24         | 184.11 |
| Diagonal and unequal |                             | 3                         | -82.29         | 186.25 |
| Unconstrained        |                             | 3                         | -78.25         | 187.27 |
| Evenness (J')        |                             | <i>Diagonal and equal</i> | 1              | -80.05 |
|                      | Equalvarcov                 | 2                         | -76.92         | 170.03 |
|                      | Equalvarcov                 | 1                         | -80.50         | 172.13 |
|                      | Diagonal and unequal        | 1                         | -79.49         | 172.60 |
|                      | Equalvarcov                 | 3                         | -76.92         | 172.72 |
|                      | Diagonal and equal          | 2                         | -80.04         | 173.71 |
|                      | Unconstrained               | 1                         | -76.41         | 174.49 |
|                      | Diagonal and equal          | 3                         | -80.04         | 176.29 |
|                      | Diagonal and unequal        | 2                         | -79.45         | 177.78 |
|                      | Unconstrained               | 2                         | -76.40         | 180.44 |
|                      | Diagonal and unequal        | 3                         | -79.45         | 180.57 |
|                      | Unconstrained               | 3                         | -76.41         | 183.60 |



**Table S3.** Species composition for the most frequent species of sharks in terms of density (DE) and standardized biomass (BIO) captured in the MEDITS surveys throughout the western Mediterranean, by geographical sub-area (GSA) considered by the General Fisheries Commission for the Mediterranean in the study area (GSA01: Northern Alboran Sea; GSA05: Balearic Islands; GSA06: Northern Spain) and depth stratum (B: 50-100 m; C: 101-200 m; D: 201-500 m; E: 501-800 m) during the periods 1994-2015 for GSA01 and GSA06, and 2001-2015 for GSA05.

| GSA   | Species                      | Stratum B |      | Species                      | Stratum C |      | Species                      | Stratum D |      | Species                      | Stratum E |      |
|-------|------------------------------|-----------|------|------------------------------|-----------|------|------------------------------|-----------|------|------------------------------|-----------|------|
|       |                              | DE        | BIO  |                              | DE        | BIO  |                              | DE        | BIO  |                              | ABU       | BIO  |
| GSA01 | <i>Scyliorhinus canicula</i> | 99.5      | 92.7 | <i>Scyliorhinus canicula</i> | 99.8      | 99.6 | <i>Galeus melastomus</i>     | 77.1      | 76.1 | <i>Galeus melastomus</i>     | 87.3      | 87.6 |
|       | Other                        | <0.5      | <7.3 | Other                        | <0.2      | <0.4 | <i>Scyliorhinus canicula</i> | 10.4      | 9.9  | <i>Etmopterus spinax</i>     | 8.1       | 4.5  |
|       |                              |           |      |                              |           |      | <i>Etmopterus spinax</i>     | 7.2       | 3.8  | <i>Galeus atlanticus</i>     | 4.1       | 3.5  |
|       |                              |           |      |                              |           |      | <i>Galeus atlanticus</i>     | 4.8       | 3.9  | Other                        | <0.5      | <0.4 |
|       |                              |           |      |                              |           |      | Other                        | <0.5      | <6.3 |                              |           |      |
| GSA05 | <i>Scyliorhinus canicula</i> | 99.5      | 96.1 | <i>Scyliorhinus canicula</i> | 94.2      | 74.9 | <i>Galeus melastomus</i>     | 63.2      | 51.6 | <i>Galeus melastomus</i>     | 93.3      | 95.2 |
|       | <i>Mustelus mustelus</i>     | 0.3       | 3.8  | <i>Squalus blainville</i>    | 5.72      | 24.9 | <i>Scyliorhinus canicula</i> | 36.3      | 45.1 | <i>Etmopterus spinax</i>     | 6.3       | 4.12 |
|       | Other                        | <0.1      | <0.1 | Other                        | <0.1      | <0.2 | Other                        | <0.5      | <3.1 | Other                        | <0.4      | <0.7 |
| GSA06 | <i>Scyliorhinus canicula</i> | 100       | 100  | <i>Scyliorhinus canicula</i> | 97.9      | 90.3 | <i>Scyliorhinus canicula</i> | 54.6      | 81.8 | <i>Galeus melastomus</i>     | 88        | 91.8 |
|       |                              |           |      | <i>Squalus acanthias</i>     | 1.7       | 8.9  | <i>Galeus melastomus</i>     | 44.7      | 17.8 | <i>Etmopterus spinax</i>     | 7.7       | 3.5  |
|       |                              |           |      | Other                        | <0.4      | <0.8 | Other                        | <0.7      | <0.4 | <i>Scyliorhinus canicula</i> | 4         | 4.1  |
|       |                              |           |      |                              |           |      |                              |           |      | Other                        | <0.3      | <0.6 |

**Table S4.** Species composition for the most frequent species of batoids in terms of density (DE) and standardized biomass (BIO) captured in the MEDITS surveys throughout the western Mediterranean, by geographical sub-area (GSAs) considered by the General Fisheries Commission for the Mediterranean in the study area (GSA01: Northern Alboran Sea; GSA05: Balearic Islands; GSA06: Northern Spain) and depth stratum (B: 50-100 m; C: 101-200 m; D: 201-500 m) during the periods 1994-2015 for GSA01 and GSA06 and 2001-2015 for GSA05.

| GSA   | Species                   | Stratum B |       | Species                  | Stratum C |      | Species                    | Stratum D |       |
|-------|---------------------------|-----------|-------|--------------------------|-----------|------|----------------------------|-----------|-------|
|       |                           | DE        | BIO   |                          | DE        | BIO  |                            | DE        | BIO   |
| GSA01 | <i>Torpedo marmorata</i>  | 45.1      | 14.3  | <i>Leucoraja naevus</i>  | 71.7      | 82.1 | <i>Leucoraja naevus</i>    | 86.1      | 72.9  |
|       | <i>Raja asterias</i>      | 43.3      | 54.9  | <i>Torpedo marmorata</i> | 23.9      | 11.6 | <i>Torpedo nobiliana</i>   | 7.6       | 11.9  |
|       | <i>Leucoraja naevus</i>   | 3.8       | 2.9   | <i>Raja asterias</i>     | 2         | 4.1  | <i>Torpedo marmorata</i>   | 4.3       | 4.4   |
|       | Other                     | <7.8      | <28   | Other                    | <2.4      | <2.2 | Other                      | <2        | <10.8 |
| GSA05 | <i>Raja miraletus</i>     | 24.6      | 5.4   | <i>Raja clavata</i>      | 55.9      | 77.7 | <i>Raja clavata</i>        | 58.7      | 61.8  |
|       | <i>Raja radula</i>        | 18.9      | 12.6  | <i>Raja polystigma</i>   | 18.3      | 3.9  | <i>Dipturus oxyrinchus</i> | 28.7      | 27.7  |
|       | <i>Raja clavata</i>       | 18.9      | 34.5  | <i>Leucoraja naevus</i>  | 16.7      | 12.1 | <i>Leucoraja naevus</i>    | 7.2       | 5.1   |
|       | <i>Raja polystigma</i>    | 14.4      | 9.5   | <i>Raja miraletus</i>    | 3.9       | 0.8  | <i>Raja polystigma</i>     | 2.9       | 0.8   |
|       | <i>Dasyatis pastinaca</i> | 4.9       | 9.5   | Other                    | <0.6      | <0.6 | Other                      | <2.5      | <4.5  |
|       | <i>Raja brachyura</i>     | 4.9       | 6.2   |                          |           |      |                            |           |       |
| GSA06 | Other                     | <14       | <23   |                          |           |      |                            |           |       |
|       | <i>Raja clavata</i>       | 28.2      | 42.7  | <i>Raja clavata</i>      | 30.2      | 39.6 | <i>Raja clavata</i>        | 36.2      | 54.8  |
|       | <i>Raja asterias</i>      | 21.9      | 22.7  | <i>Raja asterias</i>     | 11.6      | 9.2  | <i>Raja asterias</i>       | 32.9      | 15.1  |
|       | <i>Torpedo marmorata</i>  | 20.2      | 9.8   | <i>Torpedo marmorata</i> | 9.8       | 4.3  | <i>Leucoraja naevus</i>    | 12.5      | 11.6  |
|       | <i>Leucoraja naevus</i>   | 10        | 6.8   | <i>Leucoraja naevus</i>  | 8.7       | 3.4  | <i>Torpedo nobiliana</i>   | 3.8       | 2.5   |
|       | <i>Raja montagui</i>      | 5.3       | 3.9   | <i>Raja miraletus</i>    | 7.7       | 3.2  | Other                      | <14.6     | <16   |
|       | Other                     | <14.4     | <14.1 | <i>Raja montagui</i>     | 5.2       | 3.5  |                            |           |       |
|       |                           |           | Other | <26.8                    | <36.8     |      |                            |           |       |

**Table S5.** Results from dynamic factor analysis (DFA) model fitting applied to density (DE) and standardized biomass (BI) indices for sharks by depth stratum (B: 50-100 m; C: 101-200 m; D: 201-500 m; E: 501-800 m) during the periods 1994-2015 in GSA01 (Northern Alboran Sea) and GSA06 (Northern Spain) and 2001-2015 in GSA05 (Balearic Islands). For each model, the covariance matrix structure, the number of common trends (m) and the corrected Akaike Information Criterion (AICc) are given. Models in italics represent those selected as the models that produced the most favorable covariance matrix structure (with the lowest AICc values).

| Strata               | Covariance matrix structure |                             | m        |          | Log-likelihood |               | AICc          |               |
|----------------------|-----------------------------|-----------------------------|----------|----------|----------------|---------------|---------------|---------------|
|                      | DE                          | BI                          | DE       | BI       | DE             | BI            | DE            | BI            |
| Stratum B            | <i>Diagonal and equal</i>   | <i>Diagonal and unequal</i> | <i>1</i> | <i>1</i> | <i>-77.49</i>  | <i>-71.41</i> | <i>163.73</i> | <i>156.45</i> |
|                      | Equalvarcov                 | Diagonal and equal          | 1        | 1        | -76.97         | -74.22        | 165.07        | 157.18        |
|                      | Diagonal and unequal        | Equalvarcov                 | 1        | 1        | -76.45         | -73.23        | 166.51        | 157.59        |
|                      | Unconstrained               | Unconstrained               | 1        | 1        | -73.87         | -69.75        | 169.43        | 161.18        |
|                      | Equalvarcov                 | Diagonal and unequal        | 2        | 2        | -76.97         | -71.41        | 170.14        | 161.71        |
|                      | Diagonal and equal          | Diagonal and equal          | 2        | 2        | -79.23         | -74.21        | 172.09        | 162.05        |
|                      | Diagonal and equal          | Equalvarcov                 | 3        | 2        | -78.90         | -73.22        | 174.01        | 162.65        |
|                      | Unconstrained               | Diagonal and unequal        | 2        | 3        | -73.55         | -71.41        | 174.73        | 164.50        |
|                      | Equalvarcov                 | Diagonal and equal          | 3        | 3        | -78.79         | -74.21        | 176.46        | 164.63        |
|                      | Diagonal and unequal        | Equalvarcov                 | 2        | 3        | -79.11         | -73.22        | 177.11        | 165.33        |
|                      | Unconstrained               | Unconstrained               | 3        | 2        | -73.55         | -69.75        | 177.89        | 167.12        |
| Diagonal and unequal | Unconstrained               | 3                           | 3        | -78.73   | -69.64         | 179.14        | 170.29        |               |
| Stratum C            | <i>Diagonal and equal</i>   | <i>Diagonal and equal</i>   | <i>1</i> | <i>1</i> | <i>-82.02</i>  | <i>-80.29</i> | <i>172.78</i> | <i>169.33</i> |
|                      | Equalvarcov                 | Equalvarcov                 | 1        | 1        | -81.42         | -80.03        | 173.97        | 171.20        |
|                      | Diagonal and unequal        | Diagonal and unequal        | 1        | 1        | -81.98         | -80.23        | 177.57        | 174.07        |
|                      | Diagonal and equal          | Diagonal and equal          | 2        | 2        | -82.02         | -80.29        | 177.65        | 174.21        |
|                      | Equalvarcov                 | Equalvarcov                 | 3        | 2        | -81.42         | -80.03        | 179.03        | 176.27        |
|                      | Diagonal and equal          | Diagonal and equal          | 3        | 3        | -82.02         | -80.29        | 180.23        | 176.79        |
|                      | Equalvarcov                 | Equalvarcov                 | 3        | 3        | -81.42         | -80.04        | 181.72        | 178.95        |
|                      | Diagonal and unequal        | Diagonal and unequal        | 2        | 2        | -81.98         | -80.23        | 182.84        | 179.33        |
|                      | Unconstrained               | Unconstrained               | 1        | 1        | -80.92         | -78.94        | 183.52        | 179.55        |
|                      | Diagonal and unequal        | Diagonal and unequal        | 3        | 3        | -81.98         | -80.22        | 185.63        | 182.13        |
|                      | Unconstrained               | Unconstrained               | 2        | 2        | -80.92         | -78.94        | 189.47        | 185.50        |
| Unconstrained        | Unconstrained               | 3                           | 3        | -80.91   | -78.93         | 192.63        | 188.66        |               |
| Stratum D            | Diagonal and equal          | <i>Diagonal and equal</i>   | <i>1</i> | <i>1</i> | <i>-82.26</i>  | <i>-77.41</i> | <i>173.28</i> | <i>163.56</i> |
|                      | Equalvarcov                 | Equalvarcov                 | 1        | 1        | -81.84         | -77.16        | 174.82        | 165.46        |
|                      | Diagonal and unequal        | Diagonal and unequal        | 1        | 1        | -82.19         | -76.72        | 178.00        | 167.06        |
|                      | Diagonal and equal          | Diagonal and equal          | 2        | 2        | -82.27         | -77.41        | 178.15        | 168.44        |
|                      | Equalvarcov                 | Equalvarcov                 | 2        | 2        | -81.84         | -77.16        | 179.89        | 170.53        |
|                      | Diagonal and equal          | Diagonal and equal          | 3        | 3        | -82.27         | -77.41        | 180.73        | 171.02        |
|                      | Equalvarcov                 | Diagonal and unequal        | 3        | 2        | -81.85         | -76.72        | 182.57        | 172.33        |
|                      | Unconstrained               | Equalvarcov                 | 1        | 3        | -82.65         | -77.16        | 186.99        | 173.21        |
|                      | Diagonal and unequal        | Unconstrained               | 2        | 1        | -86.68         | -77.19        | 192.25        | 174.06        |
|                      | Unconstrained               | Diagonal and unequal        | 2        | 3        | -82.57         | -76.72        | 192.77        | 175.12        |
|                      | Diagonal and unequal        | Unconstrained               | 3        | 2        | -86.68         | -76.19        | 195.04        | 180.01        |
| Unconstrained        | Unconstrained               | 3                           | 3        | -82.55   | -76.20         | 195.89        | 183.17        |               |
| Stratum E            | <i>Equalvarcov</i>          | <i>Equalvarcov</i>          | <i>1</i> | <i>1</i> | <i>-74.80</i>  | <i>-80.82</i> | <i>160.74</i> | <i>172.77</i> |
|                      | Unconstrained               | Diagonal and equal          | 1        | 1        | -70.39         | -82.17        | 162.45        | 173.09        |
|                      | Equalvarcov                 | Equalvarcov                 | 2        | 2        | -74.36         | -80.56        | 164.92        | 177.32        |
|                      | Unconstrained               | Diagonal and equal          | 2        | 2        | -70.76         | -82.18        | 169.14        | 177.97        |
|                      | Equalvarcov                 | Unconstrained               | 3        | 1        | -76.11         | -78.59        | 171.11        | 178.85        |
|                      | Unconstrained               | Diagonal and unequal        | 3        | 1        | -70.65         | -82.88        | 172.08        | 179.37        |
|                      | Diagonal and equal          | Equalvarcov                 | 1        | 3        | -82.30         | -80.66        | 173.34        | 180.20        |
|                      | Diagonal and unequal        | Diagonal and equal          | 1        | 3        | -80.88         | -82.17        | 175.38        | 180.55        |
|                      | Diagonal and unequal        | Unconstrained               | 2        | 2        | -78.41         | -79.58        | 175.70        | 186.78        |
|                      | Diagonal and equal          | Diagonal and unequal        | 2        | 2        | -81.79         | -85.11        | 177.19        | 189.11        |
|                      | Diagonal and equal          | Unconstrained               | 3        | 3        | -81.37         | -79.73        | 178.94        | 190.24        |
| Diagonal and unequal | Diagonal and unequal        | 3                           | 3        | -78.92   | -85.64         | 179.51        | 192.97        |               |

**Table S6.** Results from dynamic factor analysis (DFA) model fitting applied to density (DE) and standardized biomass (BI) indices for most abundant sharks, *Scyliorhinus canicula* (Sc), *Galeus melastomus* (Gm) and *Etmopterus spinax* (Es) during the periods 1994-2015 in GSA01 (Northern Alboran Sea) and GSA06 (Northern Spain) and 2001-2015 in GSA05 (Balearic Islands). For each model, the covariance matrix structure, the number of common trends (m) and the corrected Akaike Information Criterion (AICc) are given. Models in italic represent those selected as the models that produced the most favorable covariance matrix structure (with the lowest AICc values).

| Species | Covariance matrix structure |                           | m  |    | Log-likelihood |        | AICc   |        |
|---------|-----------------------------|---------------------------|----|----|----------------|--------|--------|--------|
|         | DE                          | BI                        | DE | BI | DE             | BI     | DE     | BI     |
| Sc      | <i>Equalvarcov</i>          | <i>Equalvarcov</i>        | 1  | 1  | -80.71         | -80.33 | 172.55 | 171.81 |
|         | Diagonal and equal          | Diagonal and equal        | 1  | 1  | -82.02         | -81.84 | 172.78 | 172.42 |
|         | Equalvarcov                 | Equalvarcov               | 2  | 2  | -80.71         | -80.34 | 177.61 | 176.87 |
|         | Diagonal and unequal        | Diagonal and unequal      | 1  | 1  | -82.01         | -81.77 | 177.64 | 177.15 |
|         | Diagonal and equal          | Diagonal and equal        | 2  | 2  | -82.02         | -81.84 | 177.65 | 177.30 |
|         | Diagonal and equal          | Equalvarcov               | 3  | 3  | -82.03         | -80.33 | 180.23 | 179.56 |
|         | Equalvarcov                 | Diagonal and equal        | 3  | 3  | -80.71         | -81.84 | 180.29 | 179.88 |
|         | Unconstrained               | Unconstrained             | 1  | 1  | -80.46         | -79.18 | 182.60 | 180.05 |
|         | Diagonal and unequal        | Diagonal and unequal      | 2  | 2  | -82.01         | -81.77 | 182.90 | 182.42 |
|         | Diagonal and unequal        | Diagonal and unequal      | 3  | 3  | -82.01         | -81.78 | 185.69 | 185.21 |
|         | Unconstrained               | Unconstrained             | 2  | 2  | -80.46         | -79.35 | 188.55 | 186.32 |
|         | Unconstrained               | Unconstrained             | 3  | 3  | -80.45         | -79.34 | 191.71 | 189.48 |
| Gm      | <i>Equalvarcov</i>          | <i>Equalvarcov</i>        | 1  | 1  | -71.48         | -72.36 | 154.25 | 156.01 |
|         | Diagonal and equal          | Diagonal and equal        | 1  | 1  | -72.98         | -73.65 | 154.79 | 156.15 |
|         | Equalvarcov                 | Diagonal and equal        | 2  | 2  | -71.48         | -73.66 | 159.46 | 161.14 |
|         | Diagonal and unequal        | Equalvarcov               | 1  | 2  | -72.87         | -72.36 | 159.58 | 161.23 |
|         | Diagonal and equal          | Diagonal and unequal      | 2  | 1  | -72.97         | -73.81 | 159.78 | 161.46 |
|         | Equalvarcov                 | Diagonal and equal        | 3  | 3  | -71.49         | -73.65 | 162.25 | 163.80 |
|         | Diagonal and equal          | Equalvarcov               | 3  | 3  | -72.98         | -72.37 | 162.45 | 164.01 |
|         | Diagonal and unequal        | Unconstrained             | 2  | 1  | -72.87         | -72.30 | 165.02 | 166.78 |
|         | Unconstrained               | Diagonal and unequal      | 1  | 2  | -71.90         | -73.96 | 165.99 | 167.19 |
|         | Diagonal and unequal        | Diagonal and unequal      | 3  | 3  | -72.87         | -73.81 | 167.93 | 169.82 |
|         | Unconstrained               | Unconstrained             | 2  | 2  | -70.66         | -71.70 | 169.77 | 171.84 |
|         | Unconstrained               | Unconstrained             | 3  | 3  | -70.67         | -71.69 | 173.13 | 175.20 |
| Es      | <i>Equalvarcov</i>          | <i>Diagonal and equal</i> | 2  | 1  | -73.59         | -79.08 | 163.38 | 166.90 |
|         | Diagonal and equal          | Equalvarcov               | 2  | 1  | -75.02         | -78.11 | 163.67 | 167.35 |
|         | Diagonal and unequal        | Diagonal and unequal      | 1  | 1  | -75.12         | -78.60 | 163.86 | 170.82 |
|         | Equalvarcov                 | Unconstrained             | 1  | 1  | -76.49         | -75.11 | 164.12 | 171.89 |
|         | Unconstrained               | Equalvarcov               | 1  | 2  | -71.31         | -78.11 | 164.28 | 172.41 |
|         | Diagonal and equal          | Diagonal and equal        | 1  | 2  | -77.82         | -79.62 | 164.39 | 172.86 |
|         | Diagonal and unequal        | Equalvarcov               | 2  | 3  | -73.40         | -78.12 | 165.68 | 175.10 |
|         | Equalvarcov                 | Diagonal and equal        | 3  | 3  | -73.59         | -79.62 | 166.06 | 175.43 |
|         | Diagonal and equal          | Diagonal and unequal      | 3  | 2  | -75.02         | -79.53 | 166.24 | 177.94 |
|         | Diagonal and unequal        | Unconstrained             | 3  | 2  | -73.40         | -75.17 | 168.47 | 177.96 |
|         | Unconstrained               | Diagonal and unequal      | 3  | 3  | -71.30         | -79.53 | 170.23 | 180.73 |
|         | Unconstrained               | Unconstrained             | 3  | 3  | -71.31         | -75.14 | 173.39 | 181.07 |

**Table S7.** Results from dynamic factor analysis (DFA) model fitting applied to density (DE) and standardized biomass (BI) indices for batoids by depth stratum (B: 50-100 m; C: 101-200 m; D: 201-500 m) during the periods 1994-2015 in GSA01(Northern Alboran Sea) and GSA06 (Northern Spain) and 2001-2015 in GSA05 (Balearic Islands). For each model, the covariance matrix structure, the number of common trends (m), and the corrected Akaike Information Criterion (AICc) are given. Models in italic represent those selected as the models that produced the most favorable covariance matrix structure (with the lowest AICc values).

| Strata    | Covariance matrix structure |                           | m        |          | Log-likelihood |               | AICc          |               |
|-----------|-----------------------------|---------------------------|----------|----------|----------------|---------------|---------------|---------------|
|           | DE                          | BI                        | DE       | BI       | DE             | BI            | DE            | BI            |
| Stratum B | <i>Diagonal and equal</i>   | <i>Diagonal and equal</i> | <i>1</i> | <i>1</i> | <i>-77.16</i>  | <i>-75.46</i> | <i>163.05</i> | <i>159.67</i> |
|           | Equalvarcov                 | Equalvarcov               | 1        | 1        | -76.51         | -74.78        | 164.16        | 160.69        |
|           | Diagonal and unequal        | Diagonal and unequal      | 1        | 1        | -76.24         | -74.92        | 166.10        | 163.47        |
|           | Diagonal and equal          | Diagonal and equal        | 2        | 2        | -77.15         | -75.46        | 167.92        | 164.54        |
|           | Equalvarcov                 | Equalvarcov               | 2        | 2        | -76.52         | -74.78        | 169.23        | 165.76        |
|           | Unconstrained               | Diagonal and equal        | 1        | 3        | -73.98         | -75.46        | 169.63        | 167.12        |
|           | Diagonal and equal          | Equalvarcov               | 3        | 3        | -74.78         | -74.78        | 170.50        | 168.44        |
|           | Diagonal and unequal        | Unconstrained             | 2        | 1        | -76.24         | -73.51        | 171.36        | 168.70        |
|           | Equalvarcov                 | Diagonal and unequal      | 3        | 2        | -76.51         | -74.91        | 171.91        | 168.72        |
|           | Diagonal and unequal        | Diagonal and unequal      | 3        | 3        | -76.23         | -74.93        | 174.15        | 171.52        |
|           | Unconstrained               | Unconstrained             | 2        | 2        | -73.98         | -73.51        | 175.57        | 174.64        |
|           | Unconstrained               | Unconstrained             | 3        | 3        | -73.99         | -75.51        | 178.74        | 177.81        |
| Stratum C | <i>Diagonal and equal</i>   | <i>Diagonal and equal</i> | <i>1</i> | <i>1</i> | <i>-80.69</i>  | <i>-80.25</i> | <i>170.13</i> | <i>169.26</i> |
|           | Equalvarcov                 | Equalvarcov               | 1        | 1        | -80.05         | -79.95        | 171.24        | 171.03        |
|           | Diagonal and unequal        | Diagonal and unequal      | 1        | 1        | -80.20         | -79.64        | 174.02        | 172.90        |
|           | Diagonal and equal          | Diagonal and equal        | 2        | 2        | -80.76         | -80.27        | 175.15        | 174.16        |
|           | Equalvarcov                 | Equalvarcov               | 2        | 2        | -80.05         | -79.95        | 176.30        | 176.10        |
|           | Diagonal and equal          | Diagonal and equal        | 3        | 3        | -80.69         | -80.26        | 177.59        | 176.71        |
|           | Equalvarcov                 | Diagonal and unequal      | 3        | 2        | -80.04         | -79.65        | 178.98        | 178.19        |
|           | Diagonal and unequal        | Equalvarcov               | 2        | 3        | -80.29         | -79.95        | 179.47        | 178.78        |
|           | Unconstrained               | Unconstrained             | 1        | 1        | -79.39         | -78.72        | 180.46        | 179.11        |
|           | Diagonal and unequal        | Diagonal and unequal      | 3        | 3        | -80.20         | -79.64        | 182.08        | 180.95        |
|           | Unconstrained               | Unconstrained             | 2        | 2        | -79.43         | -78.72        | 186.49        | 185.06        |
|           | Unconstrained               | Unconstrained             | 3        | 3        | -79.39         | -78.73        | 189.57        | 188.23        |
| Stratum D | <i>Equalvarcov</i>          | <i>Diagonal and equal</i> | <i>1</i> | <i>1</i> | <i>-79.61</i>  | <i>-80.82</i> | <i>170.36</i> | <i>170.37</i> |
|           | Diagonal and equal          | Equalvarcov               | 1        | 1        | -80.86         | -79.91        | 170.46        | 170.96        |
|           | Diagonal and unequal        | Diagonal and unequal      | 1        | 1        | -80.13         | -80.52        | 173.89        | 174.66        |
|           | Diagonal and equal          | Diagonal and equal        | 2        | 2        | -77.86         | -80.81        | 175.34        | 175.24        |
|           | Unconstrained               | Equalvarcov               | 1        | 2        | -76.87         | -79.91        | 175.40        | 176.02        |
|           | Equalvarcov                 | Diagonal and equal        | 2        | 3        | -79.62         | -80.82        | 175.42        | 177.83        |
|           | Diagonal and equal          | Equalvarcov               | 3        | 3        | -80.86         | -79.91        | 177.92        | 178.70        |
|           | Equalvarcov                 | Unconstrained             | 3        | 1        | -79.62         | -78.53        | 178.11        | 178.74        |
|           | Diagonal and unequal        | Diagonal and unequal      | 2        | 2        | -80.14         | -80.52        | 179.15        | 179.92        |
|           | Unconstrained               | Diagonal and unequal      | 2        | 3        | -76.87         | -80.53        | 181.35        | 182.71        |
|           | Diagonal and unequal        | Unconstrained             | 3        | 2        | -80.13         | -78.54        | 181.94        | 184.68        |
|           | Unconstrained               | Unconstrained             | 3        | 3        | -76.86         | -78.51        | 184.51        | 187.85        |

**Table S8.** Results from dynamic factor analysis (DFA) model fitting applied to density (DE) and standardized biomass (BI) indices for *Torpedo marmorata* during the period 1994-2015 in GSA01(Northern Alboran Sea) and GSA06 (Northern Spain). For each model, the covariance matrix structure, the number of common trends (m), and the corrected Akaike Information Criterion (AICc) are given. Models in italic represent those selected as the models that produced the most favorable covariance matrix structure (with the lowest AICc values).

| Species                  | Error matrix structure    |                           | M        |          | logLik        |               | AICc          |               |
|--------------------------|---------------------------|---------------------------|----------|----------|---------------|---------------|---------------|---------------|
|                          | DE                        | BI                        | DE       | BI       | DE            | BI            | DE            | BI            |
| <i>Torpedo marmorata</i> | <i>Diagonal and equal</i> | <i>Diagonal and equal</i> | <i>1</i> | <i>1</i> | <i>-61.41</i> | <i>-61.53</i> | <i>129.41</i> | <i>129.65</i> |
|                          | Equalvarcov               | Equalvarcov               | 1        | 1        | -61.38        | -60.84        | 131.79        | 130.72        |
|                          | Diagonal and equal        | Diagonal and unequal      | 2        | 1        | -61.40        | -61.49        | 131.84        | 132.01        |
|                          | Diagonal and unequal      | Diagonal and equal        | 1        | 2        | -61.41        | -61.52        | 131.85        | 132.10        |
|                          | Equalvarcov               | Equalvarcov               | 2        | 2        | -61.39        | -60.85        | 134.35        | 133.27        |
|                          | Unconstrained             | Unconstrained             | 1        | 1        | -61.38        | -60.84        | 134.37        | 133.30        |
|                          | Diagonal and unequal      | Diagonal and unequal      | 2        | 2        | -61.41        | -61.50        | 134.40        | 134.55        |
|                          | Unconstrained             | Unconstrained             | 2        | 2        | -61.40        | -60.45        | 137.04        | 135.97        |

**Table S9.** Results from dynamic factor analysis (DFA) model fitting applied to density of size structure by length categories of *Scyliorhinus canicula* during the periods 2000-2015 in GSA01 (Northern Alboran Sea), GSA05 (Balearic Islands) and GSA06 (Northern Spain). For each model, the covariance matrix structure, the number of common trends (m) and the corrected Akaike Information Criterion (AICc) are given. Models in italics represent those selected as the models that produced the most favorable covariance matrix structure (with the lowest AICc values).

| Length category      | Covariance matrix structure | m                           | logLik | AICc   |
|----------------------|-----------------------------|-----------------------------|--------|--------|
| < 20 cm              | <i>Diagonal and unequal</i> | 2                           | -50.96 | 121.70 |
|                      | Diagonal and equal          | 1                           | -57.03 | 123.01 |
|                      | Equalvarcov                 | 1                           | -55.87 | 123.20 |
|                      | Diagonal and unequal        | 3                           | -50.95 | 124.78 |
|                      | Diagonal and unequal        | 1                           | -55.64 | 125.38 |
|                      | Unconstrained               | 1                           | -52.19 | 127.25 |
|                      | Diagonal and equal          | 2                           | -57.25 | 128.60 |
|                      | Diagonal and equal          | 3                           | -56.48 | 129.84 |
|                      | Unconstrained               | 2                           | -50.98 | 170.33 |
|                      | Equalvarcov                 | 2                           | -57.17 | 131.22 |
|                      | Equalvarcov                 | 3                           | -56.25 | 132.28 |
|                      | Unconstrained               | 3                           | -50.52 | 134.22 |
|                      | 20-30 cm                    | <i>Diagonal and unequal</i> | 1      | -54.61 |
| Diagonal and equal   |                             | 1                           | -60.95 | 130.86 |
| Diagonal and unequal |                             | 2                           | -55.68 | 131.16 |
| Unconstrained        |                             | 1                           | -54.35 | 131.57 |
| Diagonal and unequal |                             | 3                           | -54.59 | 132.06 |
| Equalvarcov          |                             | 1                           | -60.95 | 133.37 |
| Diagonal and equal   |                             | 2                           | -60.95 | 136.01 |
| Unconstrained        |                             | 3                           | -54.16 | 141.49 |
| Diagonal and equal   |                             | 3                           | -62.61 | 142.09 |
| Equalvarcov          |                             | 2                           | -63.29 | 143.45 |
| Equalvarcov          |                             | 3                           | -62.48 | 144.74 |
| Unconstrained        |                             | 2                           | -57.71 | 144.95 |
| 30-40 cm             |                             | <i>Diagonal and unequal</i> | 1      | -53.24 |
|                      | Unconstrained               | 1                           | -51.97 | 126.81 |
|                      | Diagonal and equal          | 1                           | -59.20 | 127.34 |
|                      | Diagonal and unequal        | 2                           | -53.95 | 127.69 |
|                      | Equalvarcov                 | 1                           | -58.89 | 129.24 |
|                      | Diagonal and unequal        | 3                           | -53.25 | 129.33 |
|                      | Diagonal and equal          | 2                           | -59.57 | 133.26 |
|                      | Unconstrained               | 2                           | -52.78 | 135.10 |
|                      | Equalvarcov                 | 2                           | -59.42 | 135.72 |
|                      | Unconstrained               | 3                           | -53.20 | 139.58 |
|                      | Diagonal and equal          | 3                           | -64.14 | 145.16 |
|                      | Equalvarcov                 | 3                           | -64.03 | 147.85 |
|                      | 40-50 cm                    | <i>Diagonal and unequal</i> | 1      | -55.62 |
| Unconstrained        |                             | 1                           | -51.78 | 126.43 |
| Diagonal and unequal |                             | 2                           | -54.89 | 129.58 |
| Diagonal and equal   |                             | 2                           | -59.48 | 133.06 |
| Diagonal and unequal |                             | 3                           | -55.10 | 133.07 |
| Unconstrained        |                             | 2                           | -51.78 | 133.10 |
| Diagonal and equal   |                             | 1                           | -62.65 | 134.25 |
| Equalvarcov          |                             | 2                           | -58.73 | 134.34 |
| Diagonal and equal   |                             | 3                           | -59.48 | 135.83 |
| Unconstrained        |                             | 3                           | -52.02 | 137.22 |
| Equalvarcov          |                             | 3                           | -59.05 | 137.88 |
| Equalvarcov          |                             | 1                           | -65.01 | 141.63 |
|                      |                             | <i>Equalvarcov</i>          | 1      | -62.61 |
|                      | Diagonal and equal          | 1                           | -64.80 | 138.55 |
|                      | Equalvarcov                 | 2                           | -62.62 | 142.09 |
|                      | Diagonal and unequal        | 1                           | -64.70 | 143.51 |

|         |                      |   |        |        |
|---------|----------------------|---|--------|--------|
| > 50 cm | Diagonal and equal   | 2 | -64.79 | 143.69 |
|         | Equalvarcov          | 3 | -62.62 | 145.01 |
|         | Diagonal and equal   | 3 | -64.79 | 146.46 |
|         | Unconstrained        | 1 | -62.06 | 146.98 |
|         | Diagonal and unequal | 2 | -64.70 | 149.19 |
|         | Diagonal and unequal | 3 | -64.70 | 152.27 |
|         | Unconstrained        | 2 | -62.05 | 153.66 |
|         | Unconstrained        | 3 | -62.06 | 157.29 |



**Table 10.** Results from dynamic factor analysis (DFA) model fitting applied to density of size structure by length categories of *Galeus melastomus* during the periods 2000-2015 in GSA01 (Northern Alboran Sea), GSA05 (Balearic Islands) and GSA06 (Northern Spain). For each model, the covariance matrix structure, the number of common trends (m) and the corrected Akaike Information Criterion (AICc) are given. Models in italics represent those selected as the models that produced the most favorable covariance matrix structure (with the lowest AICc values).

| Length category      | Covariance matrix structure | m                           | logLik | AICc   |
|----------------------|-----------------------------|-----------------------------|--------|--------|
| < 20 cm              | <i>Diagonal and equal</i>   | 1                           | -65.34 | 139.64 |
|                      | Diagonal and unequal        | 1                           | -65.09 | 144.28 |
|                      | Diagonal and equal          | 2                           | -65.34 | 144.79 |
|                      | Equalvarcov                 | 1                           | -67.17 | 145.80 |
|                      | Equalvarcov                 | 2                           | -64.88 | 146.63 |
|                      | Diagonal and equal          | 3                           | -65.34 | 147.56 |
|                      | Equalvarcov                 | 3                           | -64.88 | 149.55 |
|                      | Diagonal and unequal        | 2                           | -65.09 | 149.97 |
|                      | Unconstrained               | 1                           | -64.67 | 152.20 |
|                      | Diagonal and unequal        | 3                           | -65.09 | 153.05 |
|                      | Unconstrained               | 2                           | -65.98 | 161.52 |
|                      | Unconstrained               | 3                           | -64.67 | 162.51 |
|                      | 20-30 cm                    | <i>Diagonal and equal</i>   | 1      | -62.91 |
| Diagonal and unequal |                             | 1                           | -61.28 | 136.67 |
| Equalvarcov          |                             | 1                           | -63.05 | 137.57 |
| Diagonal and equal   |                             | 2                           | -62.91 | 139.92 |
| Diagonal and unequal |                             | 2                           | -61.28 | 142.35 |
| Diagonal and equal   |                             | 3                           | -62.91 | 142.69 |
| Equalvarcov          |                             | 2                           | -63.81 | 144.49 |
| Unconstrained        |                             | 1                           | -60.93 | 144.72 |
| Diagonal and unequal |                             | 3                           | -61.28 | 145.43 |
| Equalvarcov          |                             | 3                           | -63.01 | 145.81 |
| Unconstrained        |                             | 2                           | -60.87 | 151.28 |
| Unconstrained        |                             | 3                           | -60.88 | 154.92 |
| 30-40 cm             |                             | <i>Diagonal and unequal</i> | 1      | -54.45 |
|                      | Unconstrained               | 1                           | -50.26 | 123.39 |
|                      | Diagonal and equal          | 1                           | -59.91 | 128.78 |
|                      | Equalvarcov                 | 1                           | -58.88 | 129.21 |
|                      | Unconstrained               | 2                           | -50.20 | 129.95 |
|                      | Diagonal and unequal        | 2                           | -55.37 | 130.52 |
|                      | Diagonal and equal          | 2                           | -59.91 | 133.93 |
|                      | Diagonal and unequal        | 3                           | -55.61 | 134.08 |
|                      | Equalvarcov                 | 2                           | -58.88 | 134.63 |
|                      | Unconstrained               | 3                           | -51.13 | 135.44 |
|                      | Diagonal and equal          | 3                           | -61.01 | 138.91 |
|                      | Equalvarcov                 | 3                           | -61.02 | 141.82 |
|                      | 40-50 cm                    | <i>Diagonal and equal</i>   | 1      | -61.96 |
| Equalvarcov          |                             | 1                           | -61.95 | 135.37 |
| Diagonal and unequal |                             | 1                           | -60.89 | 135.89 |
| Diagonal and equal   |                             | 2                           | -61.96 | 138.02 |
| Equalvarcov          |                             | 2                           | -61.95 | 140.78 |
| Diagonal and equal   |                             | 3                           | -61.96 | 140.79 |
| Unconstrained        |                             | 1                           | -59.16 | 141.18 |
| Diagonal and unequal |                             | 2                           | -60.89 | 141.58 |
| Equalvarcov          |                             | 3                           | -61.95 | 143.69 |
| Diagonal and unequal |                             | 3                           | -60.89 | 144.65 |
| Unconstrained        |                             | 2                           | -59.16 | 147.86 |
| Unconstrained        |                             | 3                           | -59.17 | 151.49 |
|                      |                             | <i>Diagonal and equal</i>   | 1      | -62.35 |
|                      | Diagonal and unequal        | 1                           | -60.59 | 135.28 |
|                      | Equalvarcov                 | 2                           | -62.17 | 135.81 |
|                      | Diagonal and equal          | 2                           | -62.34 | 138.79 |

|         |                      |   |        |        |
|---------|----------------------|---|--------|--------|
| > 50 cm | Diagonal and unequal | 2 | -60.58 | 140.96 |
|         | Equalvarcov          | 2 | -62.17 | 141.22 |
|         | Diagonal and equal   | 3 | -62.17 | 141.56 |
|         | Unconstrained        | 1 | -59.48 | 141.83 |
|         | Diagonal and unequal | 3 | -60.58 | 144.04 |
|         | Equalvarcov          | 3 | -62.17 | 144.13 |
|         | Unconstrained        | 2 | -59.48 | 148.51 |
|         | Unconstrained        | 3 | -59.49 | 152.15 |

**Table S11.** Results from dynamic factor analysis (DFA) model fitting applied to density of size structure by length categories of *Etmopterus spinax* during the periods 2000-2015 in GSA01 (Northern Alboran Sea), GSA05 (Balearic Islands) and GSA06 (Northern Spain). For each model, the covariance matrix structure, the number of common trends (m) and the corrected Akaike Information Criterion (AICc) are given. Models in italics represent those selected as the models that produced the most favorable covariance matrix structure (with the lowest AICc values).

| Length category      | Covariance matrix structure | m                         | logLik | AICc   |
|----------------------|-----------------------------|---------------------------|--------|--------|
| < 15 cm              | <i>Diagonal and unequal</i> | 1                         | -38.97 | 93.19  |
|                      | Equalvarcov                 | 1                         | -41.18 | 94.59  |
|                      | Diagonal and equal          | 1                         | -43.67 | 96.77  |
|                      | Diagonal and unequal        | 2                         | -38.98 | 99.95  |
|                      | Equalvarcov                 | 2                         | -41.18 | 100.84 |
|                      | Diagonal and equal          | 2                         | -43.63 | 102.49 |
|                      | Unconstrained               | 1                         | -38.52 | 102.88 |
|                      | Diagonal and unequal        | 3                         | -38.98 | 103.78 |
|                      | Equalvarcov                 | 3                         | -41.18 | 104.36 |
|                      | Diagonal and equal          | 3                         | -43.55 | 105.58 |
|                      | Unconstrained               | 2                         | -38.52 | 111.61 |
|                      | Unconstrained               | 3                         | -38.53 | 116.65 |
|                      | 15–25 cm                    | <i>Equalvarcov</i>        | 1      | -40.87 |
| Diagonal and equal   |                             | 1                         | -43.24 | 95.90  |
| Diagonal and unequal |                             | 1                         | -40.58 | 96.40  |
| Diagonal and equal   |                             | 2                         | -41.55 | 98.33  |
| Diagonal and equal   |                             | 3                         | -41.54 | 101.56 |
| Equalvarcov          |                             | 2                         | -41.63 | 101.74 |
| Diagonal and unequal |                             | 2                         | -40.96 | 103.92 |
| Equalvarcov          |                             | 3                         | -41.51 | 105.02 |
| Unconstrained        |                             | 1                         | -40.53 | 106.89 |
| Diagonal and unequal |                             | 3                         | -40.95 | 107.73 |
| Unconstrained        |                             | 2                         | -40.25 | 115.08 |
| Unconstrained        |                             | 3                         | -40.23 | 120.08 |
| 25–35 cm             |                             | <i>Diagonal and equal</i> | 1      | -44.82 |
|                      | Diagonal and unequal        | 1                         | -42.10 | 99.43  |
|                      | Equalvarcov                 | 1                         | -43.81 | 99.86  |
|                      | Unconstrained               | 1                         | -37.40 | 100.63 |
|                      | Diagonal and equal          | 2                         | -44.81 | 104.86 |
|                      | Equalvarcov                 | 2                         | -43.82 | 106.12 |
|                      | Diagonal and unequal        | 2                         | -42.07 | 106.13 |
|                      | Unconstrained               | 2                         | -37.38 | 109.32 |
|                      | Equalvarcov                 | 3                         | -43.82 | 109.64 |
|                      | Diagonal and unequal        | 3                         | -42.07 | 109.96 |
|                      | Unconstrained               | 3                         | -37.34 | 114.29 |
|                      | Diagonal and equal          | 3                         | -48.17 | 114.82 |
|                      | > 35 cm                     | <i>Diagonal and equal</i> | 1      | -43.73 |
| Equalvarcov          |                             | 1                         | -43.63 | 99.49  |
| Diagonal and unequal |                             | 1                         | -42.34 | 99.91  |
| Diagonal and equal   |                             | 2                         | -43.33 | 101.88 |
| Equalvarcov          |                             | 2                         | -43.14 | 104.76 |
| Diagonal and equal   |                             | 3                         | -43.31 | 105.12 |
| Diagonal and unequal |                             | 2                         | -42.07 | 106.14 |
| Unconstrained        |                             | 1                         | -40.82 | 107.46 |
| Equalvarcov          |                             | 3                         | -43.10 | 108.20 |
| Diagonal and unequal |                             | 3                         | -42.03 | 109.89 |
| Unconstrained        |                             | 2                         | -40.29 | 115.14 |
| Unconstrained        |                             | 3                         | -40.27 | 120.14 |

**Table S12.** Length at first maturity ( $L_{50}$ ; or length in cm TL at which 50% of specimens had become mature), logistic regression coefficients of maturity ogive ( $\alpha$  and  $\beta$ ) and the smallest mature female (SMF; cm TL) of *Scyliorhinus canicula* per year and sex (F: female; M: males) in the geographical sub-areas considered by the General Fisheries Commission for the Mediterranean in the study area (GSA01: Northern Alboran Sea; GSA05: Balearic Islands; GSA06: Northern Spain) during the periods 2000-2015 in GSA01 and GSA06 and 2007-2015 in GSA05. n: number of samples analysed. Statistical significance: (\*)  $p < 0.05$ ; (\*\*)  $p < 0.01$ ; (\*\*\*)  $p < 0.001$ .

| GSAs  | Years | n   |       | $L_{50}$ |           | $\alpha$  |           | $\beta$ |         | SMF  |
|-------|-------|-----|-------|----------|-----------|-----------|-----------|---------|---------|------|
|       |       | F   | M     | F        | M         | F         | M         | F       | M       |      |
| GSA01 | 2000  | 56  | 52    | 45.54    | 41.17     | -51.81**  | -15.09**  | 0.11**  | 0.03*** | 44   |
|       | 2001  | 64  | 62    | 44.99    | 42.14     | -38.46**  | -25.52*   | 0.08**  | 0.06*   | 43   |
|       | 2002  | 205 | 332   | 45.62    | 41.20     | -27.18**  | -22.22*** | 0.06**  | 0.05*** | 44   |
|       | 2003  | 163 | 202   | 45.99    | 41.22     | -33.45*** | -25.30*** | 0.07*** | 0.06*** | 43.5 |
|       | 2004  | 93  | 104   | 45.13    | 41.60     | -22.04*** | -13.03*** | 0.04*** | 0.03*** | 41.5 |
|       | 2005  | 114 | 148   | 42.59    | 41.72     | -25.12*** | -19.65*** | 0.05*** | 0.04*** | 41   |
|       | 2006  | 164 | 254   | 43.92    | 41.94     | -26.85*** | -45.46*** | 0.06*** | 0.10*** | 40.5 |
|       | 2007  | 240 | 292   | 43.92    | 41.11     | -30.96*** | -34.20*** | 0.07*** | 0.08*** | 41   |
|       | 2008  | 125 | 151   | 42.14    | 41.90     | -25.54*** | -26.78*** | 0.06*** | 0.06*** | 39   |
|       | 2009  | 104 | 146   | 42.47    | 40.63     | -23.03*** | -20.01*** | 0.05*** | 0.04*** | 38   |
|       | 2010  | 51  | 60    | 42.15    | 41.28     | -27.30*   | -14.87**  | 0.06*   | 0.03**  | 38   |
|       | 2011  | 63  | 61    | 42.70    | 40.13     | -31.26**  | -37.24**  | 0.07**  | 0.09**  | 39   |
|       | 2012  | 87  | 101   | 41.52    | 39.72     | -25.04**  | -16.20*** | 0.06**  | 0.04*** | 37.5 |
|       | 2013  | 149 | 138   | 42.20    | 39.30     | -22.50**  | -25.10**  | 0.06**  | 0.06**  | 38   |
|       | 2014  | 98  | 97    | 40.90    | 38.95     | -34.31*** | -24.42*** | 0.08*** | 0.06*** | 38.5 |
| 2015  | 299   | 316 | 40.61 | 39.69    | -26.92*** | -22.74*** | 0.06***   | 0.06*** | 37      |      |
| GSA05 | 2007  | 670 | 917   | 41.19    | 40.98     | -23.72*** | -20.54*** | 0.06*** | 0.05*** | 38   |
|       | 2008  | 698 | 869   | 41.44    | 40.25     | -21.42*** | -22.52*** | 0.05*** | 0.05*** | 37.5 |
|       | 2009  | 722 | 890   | 40.84    | 40.05     | -25.20*** | -43.43*** | 0.06*** | 0.10*** | 37.5 |
|       | 2010  | 785 | 925   | 40.75    | 40.01     | -24.26*** | -50.30*** | 0.06*** | 0.12*** | 36.5 |
|       | 2011  | 626 | 854   | 40.64    | 39.87     | -17.18*** | -19.78*** | 0.04*** | 0.02*** | 37   |
|       | 2012  | 246 | 362   | 39.98    | 39.38     | -12.44*** | -11.75*** | 0.03*** | 0.03*** | 37.5 |
|       | 2013  | 282 | 388   | 40.60    | 39.20     | -23.40**  | -24.10**  | 0.05**  | 0.06**  | 37   |
|       | 2014  | 568 | 743   | 39.96    | 38.26     | -22.20*** | -16.87*** | 0.05*** | 0.04*** | 36.5 |
|       | 2015  | 729 | 827   | 39.45    | 38.30     | -26.84*** | -13.22*** | 0.06*** | 0.03*** | 36   |
| GSA06 | 2000  | 247 | 307   | 43.37    | 41.24     | -19.85*** | -51.32*** | 0.04*** | 0.12*** | 41.5 |
|       | 2001  | 402 | 296   | 44.66    | 40.83     | -29.12*** | -20.42*** | 0.06*** | 0.05*** | 41.5 |
|       | 2002  | 372 | 509   | 44.59    | 41.06     | -19.30*** | -25.97*** | 0.04*** | 0.06*** | 39.5 |
|       | 2003  | 363 | 370   | 44.48    | 41.12     | -15.51*** | -18.96*** | 0.03*** | 0.04*** | 39   |
|       | 2004  | 254 | 366   | 43.83    | 41.22     | -19.61*** | -15.67*** | 0.04*** | 0.03*** | 39.5 |
|       | 2005  | 555 | 632   | 42.66    | 41.72     | -21.03*** | -14.23*** | 0.05*** | 0.03*** | 38   |
|       | 2006  | 295 | 421   | 41.77    | 41.63     | -19.97*** | -14.17**  | 0.04*** | 0.03**  | 39   |
|       | 2007  | 412 | 463   | 42.08    | 41.64     | -22.10*** | -20.29*** | 0.05*** | 0.04*** | 38   |
|       | 2008  | 267 | 346   | 42.68    | 41.73     | -29.37*** | -21.03*** | 0.06*** | 0.05*** | 39.5 |
|       | 2009  | 282 | 351   | 42.10    | 41.07     | -30.84**  | -20.67*** | 0.07**  | 0.05*** | 39.5 |
|       | 2010  | 235 | 259   | 40.98    | 39.05     | -17.81*** | -30.49*** | 0.04*** | 0.07*** | 38   |
|       | 2011  | 318 | 386   | 41.86    | 40.86     | -18.28*** | -38.04*** | 0.04*** | 0.09*** | 37.5 |
|       | 2012  | 442 | 476   | 41.37    | 40.30     | -34.11*** | -29.65**  | 0.08*** | 0.07**  | 37.5 |
|       | 2013  | 393 | 433   | 40.90    | 39.60     | -26.00**  | -17.90**  | 0.06**  | 0.04**  | 36   |
|       | 2014  | 330 | 382   | 39.97    | 39.19     | -28.17*** | -26.61*** | 0.07*** | 0.06*** | 37   |
| 2015  | 534   | 539 | 40.04 | 38.74    | -21.08*** | -18.14*** | 0.05***   | 0.04*** | 36.5    |      |

**Table S13.** Length at first maturity ( $L_{50}$ ; or length in cm TL at which 50% of specimens had become mature), logistic regression coefficients of maturity ogive ( $\alpha$  and  $\beta$ ) and the smallest mature female (SMF; cm TL) of *Galeus melastomus* per year and sex (F: female; M: males) in the geographical sub-areas considered by the General Fisheries Commission for the Mediterranean in the study area (GSA01: Northern Alboran Sea; GSA05: Balearic Islands; GSA06: Northern Spain) during the periods 2000-2015 in GSA01 and GSA06 and 2007-2015 in GSA05. n: number of samples analysed. Statistical significance: (\*)  $p < 0.05$ ; (\*\*)  $p < 0.01$ ; (\*\*\*)  $p < 0.001$ .

| GSAs  | Years | n   |       | $L_{50}$ |           | $\alpha$  |           | $\beta$ |         | SMF  |
|-------|-------|-----|-------|----------|-----------|-----------|-----------|---------|---------|------|
|       |       | F   | M     | F        | M         | F         | M         | F       | M       |      |
| GSA01 | 2000  | 168 | 241   | 53.21    | 48.59     | -23.30*** | -18.54*** | 0.04*** | 0.03*** | 50.5 |
|       | 2001  | 264 | 295   | 54.04    | 49.94     | -29.20*** | -44.63*** | 0.05*** | 0.08*** | 51   |
|       | 2002  | 247 | 348   | 54.11    | 50.17     | -50.26**  | -40.57*** | 0.09**  | 0.08*** | 51   |
|       | 2003  | 270 | 384   | 53.26    | 49.55     | -37.78*** | -44.20*** | 0.07*** | 0.08*** | 48.5 |
|       | 2004  | 182 | 185   | 53.02    | 48.09     | -22.50**  | -29.30*** | 0.04**  | 0.06*** | 48.5 |
|       | 2005  | 196 | 348   | 52.90    | 48.49     | -22.01*** | -37.20*** | 0.04*** | 0.07*** | 49   |
|       | 2006  | 401 | 567   | 53.45    | 48.70     | -31.52*** | -27.45*** | 0.05*** | 0.05*** | 49.5 |
|       | 2007  | 260 | 329   | 52.93    | 48.62     | -31.91*** | -46.90*** | 0.06*** | 0.09*** | 49   |
|       | 2008  | 225 | 302   | 53.29    | 48.41     | -39.64*** | -27.51*** | 0.07*** | 0.05*** | 50   |
|       | 2009  | 270 | 323   | 53.46    | 48.39     | -36.46*** | -42.85*** | 0.06*** | 0.08*** | 51   |
|       | 2010  | 124 | 129   | 53.11    | 48.64     | -27.72*** | -27.31*** | 0.05*** | 0.05*** | 49   |
|       | 2011  | 121 | 150   | 53.57    | 48.18     | -29.21**  | -28.86*** | 0.05**  | 0.05*** | 50   |
|       | 2012  | 248 | 326   | 53.54    | 47.90     | -27.63*** | -27.19*** | 0.05**  | 0.05*** | 51   |
|       | 2013  | 446 | 481   | 54.10    | 47.20     | -25.90*   | -35.80*   | 0.05*   | 0.07*   | 51   |
|       | 2014  | 219 | 201   | 53.38    | 48.28     | -20.29*** | -36.12*** | 0.03*** | 0.07*** | 49   |
| 2015  | 389   | 482 | 52.94 | 47.21    | -22.91*** | -37.24*** | 0.04***   | 0.07*** | 49.5    |      |
| GSA05 | 2007  | 359 | 438   | 50.58    | 49.08     | -19.69*** | -29.49*** | 0.03*** | 0.06*** | 50   |
|       | 2008  | 319 | 323   | 50.31    | 48.39     | -17.28**  | -14.27*** | 0.03**  | 0.02*** | 49   |
|       | 2009  | 215 | 254   | 51.86    | 50.22     | -14.66*** | -25.57**  | 0.02*** | 0.05**  | 48.5 |
|       | 2010  | 264 | 317   | 51.51    | 49.89     | -34.90**  | -33.31*** | 0.06**  | 0.06*** | 49.5 |
|       | 2011  | 147 | 270   | 51.07    | 49.53     | -23.02*** | -24.21*** | 0.04*** | 0.04*** | 50.5 |
|       | 2012  | 191 | 317   | 52.22    | 48.97     | -32.63*   | -24.97*** | 0.06*   | 0.05*** | 50   |
|       | 2013  | 136 | 143   | 52.10    | 49.90     | -50.90*   | -31.30*   | 0.09*   | 0.06*   | 51   |
|       | 2014  | 266 | 301   | 51.33    | 48.99     | -20.33*   | -17.22**  | 0.03*   | 0.03**  | 49.5 |
|       | 2015  | 854 | 448   | 50.89    | 48.74     | -16.52*** | -23.00*** | 0.03*** | 0.04*** | 49   |
| GSA06 | 2000  | 195 | 216   | 53.81    | 50.04     | -49.54**  | -34.54*** | 0.09**  | 0.06*** | 51   |
|       | 2001  | 394 | 413   | 53.66    | 49.77     | -19.76**  | -23.37*   | 0.03**  | 0.04*   | 49.5 |
|       | 2002  | 321 | 431   | 54.14    | 49.91     | -43.09**  | -37.81*** | 0.07**  | 0.07*** | 51   |
|       | 2003  | 145 | 145   | 53.94    | 48.81     | -22.83*   | -25.55*** | 0.04*   | 0.05*** | 50.5 |
|       | 2004  | 262 | 271   | 53.32    | 48.89     | -45.55*** | -30.13*** | 0.08*** | 0.06*** | 51   |
|       | 2005  | 319 | 286   | 52.55    | 50.00     | -29.05*** | -47.18*** | 0.05*** | 0.09*** | 50   |
|       | 2006  | 346 | 431   | 51.66    | 49.12     | -23.23*** | -51.22*** | 0.04*** | 0.10*** | 49   |
|       | 2007  | 424 | 463   | 52.73    | 49.00     | -30.39*** | -46.21*** | 0.05*** | 0.09*** | 49.5 |
|       | 2008  | 112 | 91    | 53.05    | 48.06     | -36.84*   | -23.16**  | 0.06*   | 0.04**  | 50.5 |
|       | 2009  | 141 | 150   | 52.77    | 47.95     | -29.72**  | -36.20**  | 0.05**  | 0.07**  | 49   |
|       | 2010  | 86  | 115   | 53.04    | 48.41     | -22.15**  | -46.46*** | 0.04**  | 0.09*** | 49   |
|       | 2011  | 197 | 198   | 53.37    | 49.61     | -42.21*** | -30.07*** | 0.07*** | 0.06*** | 49.5 |
|       | 2012  | 366 | 385   | 52.18    | 49.22     | -37.99**  | -28.34*** | 0.07**  | 0.05*** | 48.5 |
|       | 2013  | 210 | 214   | 52.80    | 49.30     | -34.50*   | -39.70*   | 0.06*   | 0.08*   | 47   |
|       | 2014  | 192 | 213   | 51.97    | 48.70     | -32.79*** | -42.44*** | 0.06*** | 0.08*** | 48   |
| 2015  | 229   | 263 | 51.92 | 49.91    | -31.12*** | -37.81*** | 0.05***   | 0.07*** | 48.5    |      |

**Table S14.** Length at first maturity ( $L_{50}$ ; or length in cm TL at which 50% of specimens had become mature), logistic regression coefficients of maturity ogive ( $\alpha$  and  $\beta$ ) and the smallest mature female (SMF; cm TL) of *Raja clavata* per year and sex (F: female; M: males) in the GSA05 (Balearic Islands) during the period 2007-2015. n: number of samples analysed. Statistical significance: (\*)  $p < 0.05$ ; (\*\*)  $p < 0.01$ ; (\*\*\*)  $p < 0.001$ .

| Years | n   |     | $L_{50}$ |       | $\alpha$  |           | $\beta$ |         | SMF  |
|-------|-----|-----|----------|-------|-----------|-----------|---------|---------|------|
|       | F   | M   | F        | M     | F         | M         | F       | M       |      |
| 2007  | 107 | 158 | 75.15    | 68.00 | -62.63*   | -21.98*** | 0.08*   | 0.03*** | 73   |
| 2008  | 69  | 86  | 75.48    | 67.71 | -15.44**  | -21.22**  | 0.02**  | 0.03**  | 73.5 |
| 2009  | 94  | 83  | 77.02    | 66.99 | -39.03*   | -42.05**  | 0.05*   | 0.06**  | 74   |
| 2010  | 93  | 100 | 75.67    | 69.16 | -18.47*** | -18.46*** | 0.02*** | 0.02*** | 73.5 |
| 2011  | 93  | 74  | 77.70    | 66.29 | -30.13    | -16.27*** | 0.03**  | 0.02*** | 74   |
| 2012  | 88  | 70  | 75.90    | 66.41 | -27.84*   | -17.61**  | 0.03*   | 0.02**  | 73.5 |
| 2013  | 71  | 79  | 78.10    | 68.60 | -21.30*   | -13.10*   | -0.03*  | 0.02*   | 75   |
| 2014  | 113 | 120 | 76.88    | 66.52 | -53.30*   | -17.34*** | 0.06*   | 0.02*** | 73.5 |
| 2015  | 82  | 73  | 76.09    | 66.32 | -24.59**  | -24.08*** | 0.03**  | 0.03*** | 74   |
